1 **TITLE:**

2 A Method for Cost-Effective and Rapid Characterization of Genetic Parts

3

4 **AUTHORS AND AFFILIATIONS:**

5 John B. McManus<sup>a,b</sup>, Casey B. Bernhards<sup>c,d</sup>, Caitlin E. Sharpes<sup>c,d</sup>, David C. Garcia<sup>b,d</sup>, Stephanie D.  
6 Cole<sup>d</sup>, Richard M. Murray<sup>b</sup>, Peter A. Emanuel<sup>d</sup>, Matthew W. Lux<sup>d</sup>

7

8 <sup>a</sup> US Army Combat Capabilities Development Command Army Research Laboratory, 2800  
9 Powder Mill Rd, Adelphi, MD 20783, USA

10 <sup>b</sup> California Institute of Technology, Biology and Biological Engineering, 1200 East California  
11 Blvd, Pasadena, CA 91125, USA

12 <sup>c</sup> Excet, Inc., 6225 Brandon Avenue #360, Springfield, VA 22150, USA

13 <sup>d</sup> US Army Combat Capabilities Development Command Chemical Biological Center, 8198  
14 Blackhawk Rd, APG, MD 21010, USA

15

16 Email addresses of co-authors:

|                      |                                |
|----------------------|--------------------------------|
| 17 John B McManus    | jbm209@gmail.com               |
| 18 Casey B Bernhards | casey.b.bernhards.ctr@mail.mil |
| 19 Caitlin E Sharpes | caitlin.e.sharpes.ctr@mail.mil |
| 20 Stephanie D Cole  | stephanie.d.cole9.civ@mail.mil |
| 21 David C Garcia    | garcia.david@caltech.edu       |
| 22 Richard M Murray  | murray@cds.caltech.edu         |
| 23 Peter A Emanuel   | peter.a.emanuel.civ@mail.mil   |

24

25 Corresponding author:

26 Matthew W Lux matthew.w.lux.civ@mail.mil

27

28 **KEYWORDS:**

29 Synthetic Biology, TXTL, CFPS, Cell-free protein synthesis, T7 RNA Polymerase, genetic parts,  
30 genetic circuits

31

32 **SUMMARY:**

33 Well-characterized genetic parts are necessary for the design of novel genetic circuits. Here we  
34 describe a cost-effective, high-throughput method for rapidly characterizing genetic parts. Our  
35 method reduces cost and time by combining cell-free lysates, linear DNA to avoid cloning, and  
36 acoustic liquid handling to increase throughput and reduce reaction volumes.

37

38 **ABSTRACT:**

39 Characterizing and cataloging genetic parts are critical to the design of useful genetic circuits.  
40 Having well-characterized parts allows for the fine-tuning of genetic circuits, such that their  
41 function results in predictable outcomes. With the growth of synthetic biology as a field, there  
42 has been an explosion of genetic circuits that have been implemented in microbes to execute  
43 functions pertaining to sensing, metabolic alteration, and cellular computing. Here, we show a  
44 cost-effective and rapid method for characterizing genetic parts. Our method utilizes cell-free

45 lysate, prepared in-house, as a medium to evaluate parts via the expression of a reporter  
46 protein. Template DNA is prepared by PCR-amplification using inexpensive primers to add  
47 variant parts to the reporter gene, and the template is added to the reaction as linear DNA  
48 without cloning. Parts that can be added in this way include promoters, operators, ribosome  
49 binding sites, insulators, and terminators. This approach, combined with the incorporation of an  
50 acoustic liquid handler and 384-well plates, allows the user to carry out high-throughput  
51 evaluations of genetic parts in a single day. By comparison, cell-based screening approaches  
52 require time-consuming cloning and have longer testing times due to overnight culture and  
53 culture density normalization steps. Further, working in cell-free lysate allows the user to exact  
54 tighter control over the expression conditions through the addition of exogenous components,  
55 or by titrating DNA concentrations rather than relying on limited plasmid copy numbers.  
56 Because this method retains a cell-like environment, the function of the genetic part will  
57 typically mimic its function in whole cells.

58

## 59 INTRODUCTION:

60 A core effort of synthetic biology is the development of genetic tool kits containing well-  
61 characterized parts, which can be used to construct genetic circuits<sup>1</sup> that carry out useful  
62 functions when deployed in microbes or cell-free lysate. Areas in which such genetic circuits  
63 have found purchase are sensing<sup>2-5</sup>, human performance<sup>6,7</sup>, biofuels<sup>8,9</sup>, materials  
64 production<sup>10,11</sup>, and cellular computing<sup>12</sup>. Registries of standardized genetic parts have been  
65 established<sup>13</sup> to catalog new and existing parts into categories like promoters, operators, coding  
66 sequences, and terminators, to name just a few. Efforts such as the iGEM competition<sup>14</sup> have  
67 been instrumental in characterizing and cataloging these genetic parts. Methods, such as UNS<sup>15</sup>  
68 and 3G<sup>16</sup>, have been developed to facilitate the rapid assembly of these parts into useful  
69 genetic circuits. Software, such as Cello<sup>17</sup>, have even been developed to automate the  
70 composition of well-characterized parts into circuits that achieve a desired function. However,  
71 the assembly of useful genetic circuits with predictable function rests on the presumption that  
72 the genetic tool kits contain well-characterized genetic parts. Due to the necessity of these tool  
73 kits toward the advancement of synthetic biology, numerous undertakings to better catalog  
74 circuits and parts with appropriate characterization data have been described<sup>18-22</sup>.

75

76 One category of components useful to the implementation of genetic circuits are orthogonal  
77 parts, such as T7 RNA polymerase (T7 RNAP) and its cognate T7 promoter. The genetic systems  
78 of *Escherichia coli* are well-developed and many genetic circuits have been deployed and  
79 characterized in this organism. T7 RNAP is particularly well-suited as an orthogonal actuator for  
80 genetic circuits in *E. coli*, owing to its ability to partially insulate circuit function from the host  
81 metabolism<sup>23</sup>. However, the major drawback of T7 RNAP is the lack of direct regulatory  
82 mechanisms. Until recently, regulated T7 promoters were limited to a small set that had been  
83 engineered by insertion of bacterial operator sequences<sup>24,25</sup>. In order to fill this gap, we wanted  
84 to develop a method for the rapid characterization of libraries of regulated T7 promoters. We  
85 originally developed the method, presented here, for rapidly characterizing spatial  
86 combinations of the T7 promoter and bacterial operator sequences along with their cognate  
87 repressor proteins. We validated our methodology using the tetracycline regulatory system  
88 (*tet*), by investigating the effects of proximity of the tetracycline operator (*tetO*) sequence to

89 the T7 promoter on the regulation of T7 RNAP-driven expression. Our results revealed  
90 important insights into the kinetics of T7-driven expression and into the future design of  
91 engineered T7-based transcription factors<sup>26</sup>. We believe that this methodology can be applied  
92 to the characterization of other types of genetic parts as well. In the meantime, others have  
93 expanded the range of such regulated T7 promoters considerably<sup>27</sup>.

94  
95 Here, we present methodology that uses PCR to amplify template DNA via primers that add  
96 variant genetic parts to a reporter gene. These genetic parts are evaluated using cell-free  
97 lysate, prepared in-house, as a cost-effective medium to measure the expression of the  
98 reporter protein by cell-free protein synthesis (CFPS). Several studies have demonstrated the  
99 utility of CFPS for prototyping genetic components<sup>28-32</sup>. Note that while we prepare our cell-  
100 free lysates here based on Sun et al.<sup>33</sup>, numerous other commercial kits and protocols<sup>34,35</sup>  
101 should work similarly. We have included the use of an acoustic liquid handler and 384-well  
102 plates to increase throughput and decrease the volume of materials required. Previous work  
103 has demonstrated successful use of acoustic liquid handling at significantly lower volumes<sup>36,37</sup>  
104 with variability comparable to manual pipetting at larger volumes<sup>38</sup>. CFPS removes the  
105 requirement of working in whole cells and reduces the amount of time for screening many  
106 genetic parts to a single day, while still maintaining a cell-like environment. A second  
107 advantage of CFPS is that the user can exact tighter control over the expression conditions  
108 through the addition of exogenous components via the acoustic liquid handler. The generation  
109 of variants by changing PCR primers and then using linear DNA in the CFPS reactions  
110 dramatically cuts the cost and time of variant preparation compared to cloning or synthesis.  
111 Though we had initially developed this method for the characterization of engineered T7  
112 promoters regulated by transcription factors<sup>26</sup>, other parts that can be changed by PCR-  
113 amplification include promoters, operators, RBS sequences, insulators, and terminators. We  
114 hope that through this methodology, the synthetic biology community can grow the number of  
115 characterized parts for the assembly of predictable genetic circuits with useful function.

116

## 117 **PROTOCOL:**

### 118 1. Preparation of Cell Extract

119

#### 120 1.1. Preparation of Media

121

122 1.1.1. For 2xYT media: Add 16 g of tryptone, 10 g yeast extract, 5 g NaCl to 900  
123 mL of deionized water. Adjust pH to 7.0 with 5 M NaOH and adjust  
124 volume of solution to 1 L using deionized H<sub>2</sub>O. Alternatively, purchase  
125 2xYT media.

126

127 1.1.2. For S30B buffer: Prepare a solution of 14 mM Mg-glutamate, 60 mM K-  
128 glutamate, and 5 mM Tris (pH 8.2) in 2 L of deionized water. Use 2 M Tris  
129 to get pH to 8.2. Store at 4 °C. Complete solution by adding DTT to 1 mM  
130 final concentration just before use.

131

#### 132 1.2. Preparation of Cells

- 133
- 134 1.2.1. Streak *E. coli* K12 Rosetta cells onto a plate of LB agar and incubate at
- 135 37°C for 10 to 14 h.
- 136
- 137 1.2.2. From a single colony, inoculate one 10 mL culture tube containing 3 mL of
- 138 2xYT medium with *E. coli* K12 Rosetta cells. Incubate this tube at 37°C,
- 139 shaking at 250 rpm, for 8 h.
- 140
- 141 1.2.3. From the 3 mL culture, inoculate 50 µL into a 500 mL flask containing 50
- 142 mL 2xYT medium. Incubate this flask at 37°C, shaking at 250 rpm, for 8 h.
- 143
- 144 1.2.4. From the 50 mL culture, inoculate 7.5 mL into four 4 L baffled flasks
- 145 containing 0.75 L 2xYT medium. Incubate these flasks at 37°C, shaking at
- 146 220 rpm, until they have reached an optical density at 600 nm of 2 to 4,
- 147 approximately 3-4 h.
- 148
- 149 1.2.5. Harvest the cells from each flask by centrifugation, in 1 L containers, at
- 150 5000 x g for 12 min. Discard the supernatant.
- 151
- 152 1.2.6. Wash each cell pellet with 150 mL of ice cold S30B buffer by completely
- 153 resuspending them, then collect the cells again by centrifugation at 5,000
- 154 x g for 12 min. Discard the supernatant.
- 155
- 156 1.2.7. Wash each cell pellet again in 40 mL of ice cold S30B buffer by completely
- 157 resuspending them. Transfer the cells to a 50 mL conical tube and collect
- 158 the cells again by centrifugation at 775 x g for 8 min. Discard the
- 159 supernatant.
- 160
- 161 1.2.8. Weigh the cell pellets. Flash freeze the cell pellets in liquid nitrogen. Store
- 162 the cell pellets at -80°C.
- 163

### 164 1.3. Cell Lysis

- 165
- 166 1.3.1. Thaw cell pellets on ice.
- 167
- 168 1.3.2. Resuspend each cell pellet in 1.4 mL of S30B buffer per 1 g of cell pellet.
- 169
- 170 1.3.3. Lyse the cells by French pressure cell at 640 psi at 4°C. Collect the lysate
- 171 on ice and add 3 µL of 1 M DTT per 1 mL of lysate immediately after lysis.
- 172
- 173 NOTE: It is best to tap the French press release valve with a small metal
- 174 rod in order to maintain even pressure and avoid sudden drops in
- 175 pressure.
- 176

- 177 1.3.4. Clear the lysate by centrifugation at 30,000 x g for 30 min at 4°C and  
178 discard the pellet.  
179
- 180 1.3.5. Centrifuge the supernatant a second time at 30,000 x g for 30 min at 4°C  
181 and discard the pellet.  
182
- 183 1.3.6. Incubate the supernatant in a 37°C water bath for 1 h.  
184
- 185 1.3.7. Clear the supernatant by centrifugation at 15,000 x g for 15 min at 4°C  
186 and discard the pellet.  
187
- 188 1.3.8. Centrifuge the supernatant a second time at 15,000 x g for 15 min at 4°C  
189 and discard the pellet.  
190
- 191 1.3.9. Distribute the supernatant in 100 µL aliquots into 1.5 mL microcentrifuge  
192 tubes and flash freeze them in liquid nitrogen. Store the supernatant at -  
193 80°C.  
194

## 195 2. Linear Template Preparation

### 196 2.1. Primer Design

- 197
- 198
- 199 2.1.1. For the forward primers, choose a minimum of 20 bp on the 3' end of  
200 the primer to match the 5' end of the coding strand of the reporter gene.  
201 Design the remainder of the 5' end of the primer to add the genetic  
202 parts of interest to the reporter gene via PCR-amplification (Fig. 1A and  
203 Fig. 2).  
204
- 205 2.1.2. For the reverse primer, choose a sequence on the 5' end of the non-  
206 coding strand of the reporter gene, directly downstream from the  
207 terminator. Alternatively, for parts at the end of the gene, such as C-  
208 terminal tags, design primers to introduce the part of interest. Note that  
209 inclusion of a terminator may not be required for expression from linear  
210 DNA in cell-free systems. Be sure that the reverse primer's annealing  
211 temperature is within 5°C of the annealing temperature of the entire  
212 forward primer.  
213

214 NOTE: DNA providers typically synthesize primers with a standard length  
215 of up to ~60 bases. While longer primers can be synthesized and  
216 implemented, costs often increase dramatically. Alternatively, multiple  
217 overlapping primers can be designed to the 5' or 3' ends of the gene,  
218 and longer sequences or multiple parts can be added to the reporter  
219 through multiple rounds of PCR.  
220

221 NOTE: The template containing the reporter gene to be amplified need  
222 not be a plasmid. Genomic DNA or linear blocks ordered from  
223 commercial vendors may also be suitable as template DNA.

224

## 225 2.2. Linear Template Amplification

226

227 2.2.1. Determine the number of PCR reactions to perform and calculate the  
228 amount of each component required using Table 1.

229

230 2.2.2. Prepare the master mix and store it on ice. Aliquot 40  $\mu$ L of the master  
231 mix into the determined number of PCR tubes and add 10  $\mu$ L of Forward  
232 Primer (5  $\mu$ M) to each appropriately-labeled, corresponding PCR tube.

233

234 2.2.3. Place PCR tubes into the thermocycler and run the following PCR  
235 program:

236

|     |               |             |
|-----|---------------|-------------|
| 237 | 98°C - 3 min  | } 30 cycles |
| 238 | 98°C - 15 s   |             |
| 239 | XX°C - 20 s   |             |
| 240 | 72°C - YY min |             |
| 241 | 72°C - 10 min |             |
| 242 | 4°C - hold    |             |

243

244 Where XX represents the temperature for the lower annealing  
245 temperature primer. YY represents the extension time calculated for  
246 the length of the amplicon (30 s – 1 min / kb for Q5 polymerase). These  
247 conditions may need to be optimized for different primers and/or  
248 templates (see 2.3 and Discussion).

249

250 2.2.4. Add 1  $\mu$ L of NdeI restriction enzyme to digest the original template.  
251 Incubate the reaction at 37°C for 1 h. This step is not necessary if a  
252 synthetic block was used as the original template.

253

254 2.2.5. Analyze 5  $\mu$ L of each PCR product by gel electrophoresis. Separate the  
255 product using a 1% agarose gel at 180 V for 20 min.

256

257 2.3. Purify the linear template according to the QIAquick PCR Purification Kit, or by your  
258 preferred PCR cleanup method. If multiple bands were present by gel  
259 electrophoresis analysis, see the Discussion section for troubleshooting OR purify  
260 the correct molecular weight bands by QIAquick Gel Extraction Kit, or by your  
261 preferred extraction method.

262

263 2.4. Quantify each DNA template using a NanoDrop spectrophotometer, or your  
264 preferred spectrophotometric instrument. Be sure to assess DNA template quality

265 by assuring that the 260 nm / 280 nm ratio is approximately 1.8. Further, a portion  
266 of the samples can be separated using a 1% agarose gel at 180 V for 20 min, a  
267 second time, to check that any unwanted bands were removed during template  
268 purification. DNA samples may be stored at -20 °C.  
269

### 270 3. Purified Protein Preparation

271

#### 272 3.1. Protein Expression

273

274 3.1.1. For each protein to be expressed, assemble the *E. coli*-codon optimized  
275 gene into a pET-22b expression vector and transform the expression  
276 plasmid into BL21(DE3) Rosetta expression cells.  
277

278

279 3.1.2. For each protein, inoculate, from a single colony, a 10 mL culture tube  
280 containing 3 mL of LB medium. Incubate these tubes at 37°C, shaking at  
281 250 rpm, overnight.

282

283 3.1.3. Inoculate a 2 L flask containing 750 mL of LB medium with 1 mL of  
284 overnight culture. Incubate these flasks at 37°C, shaking at 250 rpm, until  
285 they reach an OD<sub>600</sub> of 0.6–1.0.

286

287 3.1.4. Induce protein expression by adding 0.75 mL of 1 M IPTG in water to each  
288 flask, and continue to incubate these flasks at 37°C, shaking at 250 rpm,  
289 for 4 h.

290

291 3.1.5. Harvest the cells from each flask, using a 1 L centrifuge bottle, by  
292 centrifugation at 5000 x g for 12 min. Discard the supernatant.

293

294 3.1.6. Transfer the pellets to a 50 mL conical tube and weight each pellet.  
295 Expect 2-5 g per 0.75 mL. Flash-freeze the cells in liquid nitrogen and  
296 store them at -80 °C or proceed to 4.2.1.

297

#### 298 3.2. Protein Purification by Nickel Affinity Column Chromatography

299

300 3.2.1. Thaw the cell pellet in room temperature water and resuspend,  
301 homogenously, in lysis buffer, using 5 mL lysis buffer per 1 g cell pellet.

302

303 3.2.2. Lyse the cells by sonication. Separate the cell homogenate so that there  
304 is no more than 30 mL per 50 mL conical tube and place each tube on ice.  
305 Lyse the cells using a QSonica Ultrasonic Processor sonicator with a 0.16  
306 cm diameter probe. Lyse the cells in 15 s rounds with 30 s breaks, 10  
307 times.

308

NOTE: Avoid foaming, as this denatures protein. Formation of foam can

- 309 be avoided by keeping the tip at least 2/3 submerged in the lysate while  
310 it is operational.  
311  
312 3.2.3. Clear the lysate by centrifugation at 15,000 x g for 30 min at 4 °C.  
313  
314 3.2.4. Incubate each 5 mL of supernatant with 1 mL of Ni-NTA resin at 4 °C, on a  
315 Thermo tube rotator (or equivalent) at 10 rpm for 1 h. Separate the cell  
316 lysate / Ni-NTA slurry so that there is no more than 36 mL per 50 mL  
317 conical tube.  
318  
319 3.2.5. Load the resin into a 5 cm diameter column. Wash the resin with 10 resin  
320 bed volumes of wash buffer.  
321  
322 3.2.6. Collect the protein with three resin bed volumes of elution buffer and  
323 concentrate the volume to 1.5 mL using a centrifugal concentrator with  
324 the appropriate molecular weight cut-off membrane for each protein.  
325  
326 3.2.7. Dialyze the protein against 2 L of dialysis buffer at 4 °C for 1 h. Dialyze  
327 the protein again against 2 L of dialysis buffer overnight at 4 °C.  
328  
329 3.2.8. Quantify the protein using its molar extinction coefficient and absorbance  
330 at 280 nm. Analyze the protein for purity by separating it using SDS-PAGE  
331 electrophoresis. Store the protein at -80 °C.  
332

#### 333 4. Cell-Free Protein Synthesis

##### 334 4.1. Preparation of CFPS Reaction Mixture

- 335  
336  
337 4.1.1. Prepare Supplement Mix by following the Amino Acid Solution  
338 Preparation, Energy Solution Preparation, and Buffer Preparation steps in  
339 Sun et al.<sup>33</sup> These three solutions can be combined ahead of time,  
340 aliquoted, and stored at -80 °C. Final concentrations should match those  
341 described in Sun et al.<sup>33</sup> in the Experimental Execution of a TX-TL Reaction  
342 section.  
343  
344 4.1.2. Prepare GamS (protects linear DNA from degradation; see note in next  
345 section), T7 polymerase, and repressor proteins using steps above (see 3.  
346 Purified Protein Preparation), or obtain from a commercial vendor.  
347  
348 4.1.3. Determine the number of CFPS reactions to be performed and calculate  
349 the amount of each component required using Table 2.  
350

351 NOTE: The table above is a for a standard CFPS reaction. The volume of the  
352 template, polymerase, and repressor protein can be varied or other



353 components can be added (or subtracted) by adjusting the amount of water  
354 such that the final volume of each reaction mixture is always 10  $\mu$ L.  
355 Additionally, other components can be optionally dispensed by acoustic liquid  
356 handling instead of being present in the master mix (see Troubleshooting).

357  
358 NOTE: While GamS protein is used here to limit degradation of linear DNA by  
359 blocking the RecBCD complex<sup>39,40</sup>, other approaches are available<sup>41-43</sup> and  
360 some CFPS recipes based on purified components do not require any  
361 additions<sup>44</sup>.

362  
363 4.1.4. Thaw all components on ice and prepare a master mix by mixing each  
364 component as calculated above. Mix all the components thoroughly, by  
365 pipette. Keep the master mix on ice.

366  
367 4.1.5. Chill a 384-well plate on ice and distribute the master mix in 9  $\mu$ L aliquots  
368 into each well using an electronic repeater pipette.

#### 369 370 4.2. Distribution of Additional Components by Acoustic Liquid Handling

371  
372 4.2.1. Calculate the amount of repressor protein (and optional other  
373 components) required for all the CFPS reactions.

374  
375 4.2.2. Thaw the repressor protein on ice and distribute it into a Labcyte Echo  
376 source plate or other appropriate plate. Be sure to consider the  
377 appropriate amount of dead volume required for the type of source plate  
378 used.

379  
380 4.2.3. Distribute the repressor protein in 1  $\mu$ L volumes into the appropriate  
381 wells via the Echo acoustic liquid handler or similar instrument. More  
382 information on distribution troubleshooting can be found in the  
383 Discussion sections.

#### 384 385 4.3. Standard Curves

386  
387 4.3.1. Include a serial dilution of purified reporter protein (see Section 3 for  
388 protein purification)<sup>38</sup> or appropriate chemical standard<sup>45</sup> on the plate to  
389 enable comparison of results with other studies and other labs. In our  
390 previous publication<sup>26</sup>, a standard curve for sfGFP was generated using  
391 purified protein with concentrations ranging from 0  $\mu$ M to 10  $\mu$ M.

#### 392 393 4.4. Running CFPS Reactions

394  
395 4.4.1. Pre-warm the plate reader (Biotek H10 used in our previous  
396 publication<sup>26</sup>) to 37°C. Ensure that the settings match those for the

397 reporter protein being measured (Ex: GFP, fluorescence, 480 nm ex / 528  
398 nm em). No shaking steps are required. It may be helpful to run a test  
399 reaction first to set the appropriate gain or sensitivity setting that will  
400 capture the change in fluorescence without signal overflow.

401  
402 NOTE: Read intervals of 10 minutes are sufficient to achieve good  
403 resolution on sfGFP expression curves using the Biotek H10 plate reader.  
404 However, this may change depending on the reporter protein and  
405 particular CFPS recipe.

406  
407 4.4.2. Seal the 384-well plate with an impermeable plastic sealable lid to  
408 prevent evaporation. The instrument should be set to a 1 °C vertical  
409 temperature gradient. This ensures that the condensation does not form  
410 on the seal. Place the 384-well plate on the plate holder and begin  
411 reading.

## 412 413 5. Data Interpretation

414  
415 5.1. At the completion of the run, export the data as a .csv file.

416  
417 5.2. Data should be converted to standardized units if applicable (see Section 4.3).

418  
419 5.3. For characterization of repressible promoters, a dose response curve of reporter  
420 expression against a titration of repressor concentration is informative. To interpret  
421 these data, plot the maximum output values from each reaction against the  
422 repressor protein concentration, then fit each dose response profile to a four-  
423 parameter logistic curve using GraphPad Prism or the software of your choice.

424  
425 NOTE: The maximum output values used here are derived from the sigmoidal fit of  
426 each protein expression curve.

427  
428 5.4. Calculate the maximum repression values for each data set by subtracting the top  
429 and bottom values, determined by the four-parameter logistic curve fit. The  
430 maximum repression values and EC<sub>50</sub> values, determined by the four-parameter  
431 logistic fit, can be used to identify changes in the operator- promoter relationship.

## 432 433 **REPRESENTATIVE RESULTS:**

### 434 435 ***TetO Represses T7 RNAP within the First 13 Bases Downstream from the T7 Promoter***

436  
437 To demonstrate the utility of our methods, we present results that describe the effects of  
438 proximity of the *tetO* sequence to the T7 promoter on the regulation of T7 RNAP-driven  
439 expression. The full results and their implications can be found in the work of McManus et al.<sup>26</sup>.

440

441 Fifteen linear templates, varying only in the distance of the T7 promoter relative to the *tetO*  
442 sequence, were prepared by PCR-amplifying the sfGFP reporter as described in Linear Template  
443 Preparation (see Section 2). Amplicons were analyzed by gel electrophoresis and added to CFPS  
444 reactions, then distributed into a 384-well plate. sfGFP expression was measured from each  
445 template with a titration of 12 different concentrations of the TetR protein, in triplicate, using  
446 an Echo acoustic liquid handler. At 36 CFPS reactions per template and 15 templates, a total of  
447 540 reactions for the entire set of T7- *tetO* combinations were performed. The entire  
448 evaluation was carried out on two plates in two Biotek H10 plate readers.

449  
450 For data analysis, the sfGFP expression curves were first converted to units of  $\mu\text{M}$  sfGFP via  
451 standard curve, then fit to a sigmoidal regression. The maximum expression values as  
452 determined by the sigmoid fit were plotted against TetR concentration, and these dose-  
453 response profiles were fit to a four-parameter logistic to yield  $\text{EC}_{50}$  values and maximum  
454 repression values as described in the Protocol. We found that expression values varied from  
455 template to template. This may be in part due to impurities carried over during template  
456 purification. However, as shown in our previous publication<sup>26</sup>, we were able to normalize these  
457 expression values and derive meaningful conclusions by comparing these normalized values.  
458 Analysis of these values shows that the T7 RNAP downregulates T7-driven expression equally  
459 up through 13 bp downstream from the start of the T7 transcript (Fig. 3). This has implications  
460 for the future design of regulatable T7-driven gene circuits.

461  
462 We also performed the same experiment using circular plasmid DNA as template, rather than  
463 PCR-amplified template. The purpose of this experiment was to determine the differences, if  
464 any, between circular and linear template. Our results, detailed in our previous manuscript<sup>26</sup>,  
465 indicated that while the pattern of regulation, presented in the previous section, remains  
466 unchanged (Fig. 3), the  $\text{EC}_{50}$  values show a significant difference. We hypothesized that non-  
467 specific binding of TetR to the vector DNA could explain the observed difference. Experimental  
468 results showed that addition of linear vector DNA to reactions with linear template DNA  
469 reduced the difference to non-statistical significance, though did not rule out contributions  
470 from other factors, such as differences in periodicity of the DNA helix for linear vs. circular  
471 formats, which, in turn, could affect TetR binding. Depending upon the application, the use of  
472 linear template may require additional validation.

473

474 **FIGURE AND TABLE LEGENDS:**

475

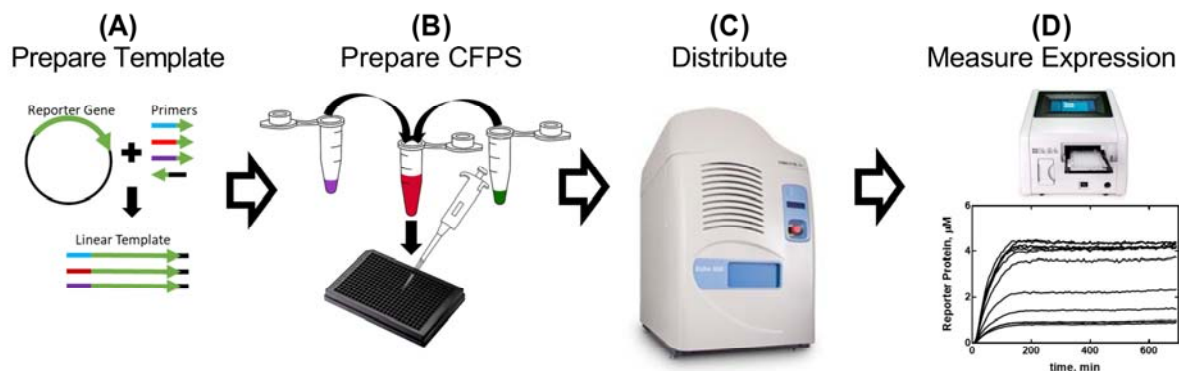

476  
 477 **Figure 1. Single-day Workflow for the Evaluation of Promoter Parts in Cell-Free Extract.** (A) A  
 478 reporter gene is PCR-amplified using primers containing genetic parts to be evaluated in order  
 479 to prepare template for CFPS reactions (2–5 h). (B) The cell-free reaction mix is prepared as  
 480 detailed in the Protocol and distributed into a 384 well plate (30 min). The template can be  
 481 added into the cell-free master mix or as part of the (C) distribution of additional components,  
 482 which can include repressor proteins, effector molecules, and any other conditional effectors (10  
 483 min). (D) Reporter protein expression from each reaction is measured in a plate reader (2 – 16  
 484 h, depending on CFPS recipe and construct).  
 485

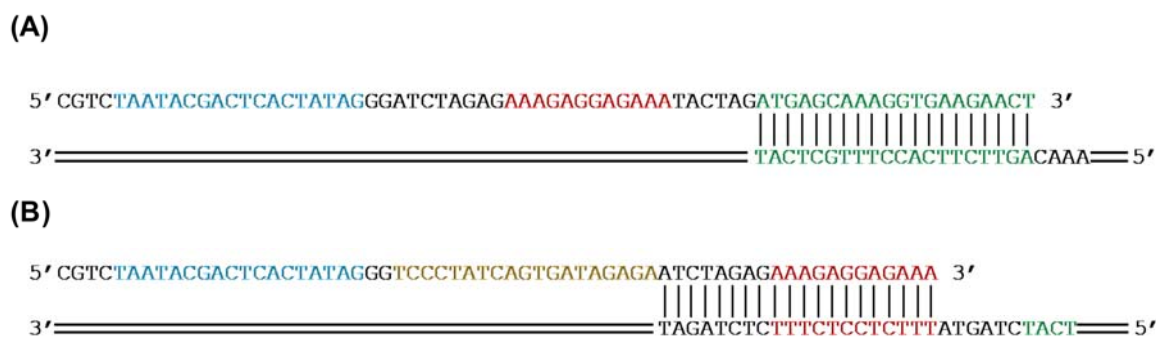

486  
 487 **Figure 2. Primer Design for Adding Genetic Parts to a Reporter Gene by PCR-Amplification.**  
 488 Design the 3' end of the primer (top) such that it will hybridize to at least 20 bp of the 3' end of  
 489 the non-coding strand of the reporter gene (bottom). (A) The sfGFP reporter gene (green) will  
 490 be amplified to add an RBS (red) and a T7 promoter (blue) by PCR. (B) The sfGFP (green) AND an  
 491 RBS (red) will be amplified to add a tetO sequence (gold) and a T7 promoter (blue) by PCR.  
 492

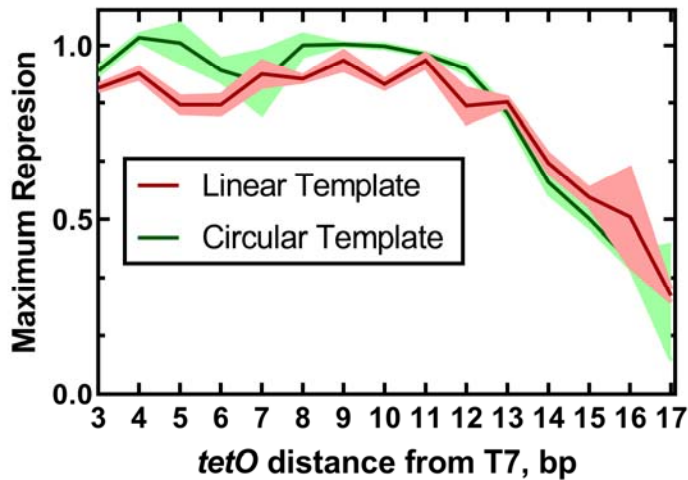

493  
494 **Figure 3. The Effect of tetO Position on the Regulation of T7-Driven Expression.** Maximum,  
495 normalized repression values were plotted against tetO position to reveal the effects of tetO  
496 position on the regulation of T7-driven expression. The traces represent the mean and standard  
497 deviations for three replicates. This figure has been modified from McManus et al.<sup>26</sup> under a  
498 Creative Commons CC-BY license.  
499

### Echo Dispensing of 1X PBS + Tartrazine Dye into Consecutive Wells

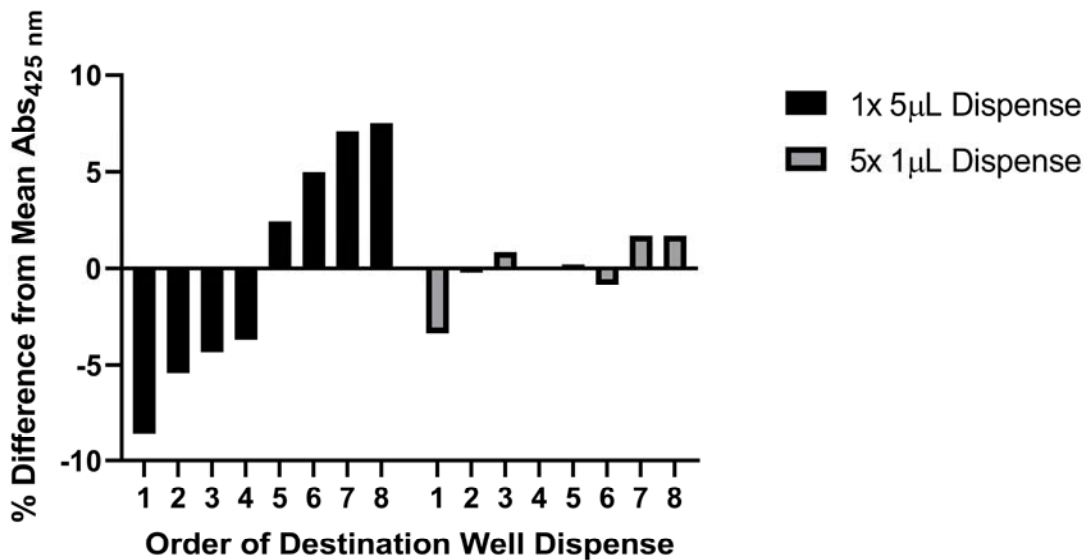

500  
501 **Figure 4. Using Tartrazine Dye to Validate Liquid Dispensing with an Acoustic Liquid Handler.**  
502 A solution of 1x phosphate buffered saline (PBS), pH 7.4 containing 0.25 mM tartrazine dye was  
503 used to evaluate two methods of programming an Echo acoustic liquid handler to dispense  
504 volumes > 1 µl. In one method (results shown in black bars), 5 µl of the tartrazine solution were  
505 dispensed from a single source well into each of eight consecutive destination wells of a 384-

506 well plate using a single programming command. In a second method (results shown in gray  
 507 bars), 1  $\mu\text{l}$  was dispensed from a single source well into each of eight consecutive destination  
 508 wells using a single programming command, and then this step repeated a total of five times.  
 509 The destination plate was sealed and centrifuged at 1,500  $\times g$  for 1 min, and the absorbance at  
 510 425 nm measured with a plate reader. Representative results of nine experiments are shown  
 511 and demonstrate more consistent dispensing across the series of eight destination wells when  
 512 the 5  $\mu\text{l}$  transfer is divided into separate 1  $\mu\text{l}$  dispenses. While the theoretical final volume in  
 513 each destination well is the same for both methods (5  $\mu\text{l}$ ), the second method utilizes five  
 514 separate programming commands resulting in the Echo resurveying the source well between  
 515 each command. Based on these observations and personal communications with Labcyte  
 516 engineers, it is recommended that transfers  $> 1 \mu\text{l}$  be broken down into multiple transfers of  $\leq 1$   
 517  $\mu\text{l}$  to improve accuracy.  
 518

| Component Name                    | Volume for 1 reaction ( $\mu\text{L}$ ) | Volume for 110% of X number of reactions ( $\mu\text{L}$ ) |
|-----------------------------------|-----------------------------------------|------------------------------------------------------------|
| Q5 PCR Premix                     | 25                                      |                                                            |
| Water                             | 4                                       |                                                            |
| Reverse Primer (5 $\mu\text{M}$ ) | 10                                      |                                                            |
| Template (1–3 ng/ $\mu\text{L}$ ) | 1                                       |                                                            |
| <b>Master Mix Total:</b>          | 40                                      |                                                            |
| Forward Primer (5 $\mu\text{M}$ ) | 10                                      |                                                            |

519 **Table 1. Reagents for PCR reactions.**

520

| Component Name                    | Volume for 1 reaction ( $\mu\text{L}$ ) | Volume for 110% of X number of reactions ( $\mu\text{L}$ ) |
|-----------------------------------|-----------------------------------------|------------------------------------------------------------|
| Cell Extract                      | 4.2                                     |                                                            |
| Supplement Mix                    | 3.3                                     |                                                            |
| GamS Protein (207 $\mu\text{M}$ ) | 0.15                                    |                                                            |
| Template DNA (20 nM)              | 1                                       |                                                            |
| T7 Polymerase (13 mg/mL)          | 0.12                                    |                                                            |
| Water                             | 0.73 (this number may vary)             |                                                            |
| <b>Master Mix Total:</b>          | 9                                       |                                                            |
| Repressor Protein:                | 1                                       |                                                            |

521 **Table 2. Reagents for CFPS reactions.**

522

## 523 DISCUSSION:

524

525 The protocols described here provide a cost-effective and rapid means to screen genetic parts  
 526 via the expression of a reporter protein by CFPS. Well-characterized genetic parts are crucial to

527 the design of predictable genetic circuits with useful function. This methodology increases  
528 throughput and decreases the time needed to screen new genetic parts by removing the  
529 requirement to work in living cells, while retaining functionality that mirrors the cellular  
530 environment by retaining the metabolic process of protein expression in the cell lysate. Our  
531 protocol can be performed in one day after receipt of primers, compared to at least three for  
532 traditional cloning (one day each for construct assembly and transformation, sequence  
533 verification of clones, and culturing of cells for assessment). We further estimate the cost per  
534 construct to be roughly one third compared to traditional cloning (Supplementary Table 1).  
535 Commercial synthesis services take a minimum of 5 business days, though may have similar  
536 costs to our methods if linear fragments are screened directly in CFPS; we have not verified this  
537 approach.

538

### 539 ***Customizing the Methodology***

540

541 We originally developed this methodology to investigate the effects of operator proximity on  
542 the T7 promoter<sup>26</sup>. We have attempted to present the protocols here in a more generic  
543 format, such that they can be applied to promoters, operators, ribosome binding sequences,  
544 insulators, and terminators. These genetic parts can be added to the 5' or 3' end of the  
545 reporter gene by PCR using primers for each design, obviating the need for synthesis or cloning  
546 of each variant to test. The resulting PCR products serve as template DNA for evaluation via the  
547 expression of a reporter protein. In our work, the affinity purification protocol provided here  
548 was used for TetR and GamS. The same procedure can be used for the expression and  
549 purification of other repressors, activators, polymerases, sigma factors, and other proteins  
550 cognate to a genetic part of interest. Purification and titration of these proteins into CFPS  
551 reactions enables a more detailed characterization of a particular genetic part. The procedure  
552 given here for purifying protein may need to be altered to the desired protein being expressed.  
553 Finally, numerous alternative CFPS protocols exist and each should be amenable to this  
554 methodology. Varying the concentrations of underlying constituent components of the CFPS is  
555 also possible. The use of acoustic liquid handling enhances the ability to test the myriad  
556 conditions by increasing throughput and decreasing materials required.

557

### 558 ***Future Directions***

559

560 Beyond characterization of individual parts, the same method can be used to screen  
561 combinations of parts that form complex circuits, such as logic circuits<sup>17</sup> or oscillators<sup>46,47</sup>.  
562 Alternatively, the method can be used for screening and optimization of biosensors for  
563 applications in epidemiological diagnostics<sup>48-51</sup> or hazard detection and quantification<sup>3,4,52</sup>.  
564 Similar to our TetR-responsive T7 promoters study, these detection circuits are frequently  
565 designed around the interaction between a repressor protein and its cognate effector in order  
566 to regulate the expression of genes via an operator sequence, making our method highly  
567 appropriate; however, other biosensor mechanisms, such as riboswitches, can also be screened  
568 with our approach. Further, the *E. coli* cell-free lysate can also be replaced with lysate from the  
569 organism in which a biosensor is to be deployed in order to better mimic the function of that  
570 sensor in its host organism. Several publications have described the preparation of different

571 cell lysates for protein expression including those from *Bacillus subtilis*<sup>53</sup>, *Pseudomonas*  
572 *putida*<sup>54</sup>, and *Vibrio natrigens*<sup>55</sup>, to name a few. Their methodology can be used in place of the  
573 Preparation of Cell Extract (1) protocol, if desired.

574

### 575 **Troubleshooting**

576

577 Finally, it is worth noting that different applications may require different levels of optimization  
578 before the collection of useful experimental data can begin. Four key areas are: (1) in the PCR-  
579 amplification of template, (2) in the distribution of components by the acoustic liquid handler,  
580 (3) protein expression and purification, and (4) CFPS performance.

581

582 Depending on the length and identity of the primers used to amplify linear template, the  
583 conditions of the PCR reaction may have to be optimized to increase the amount of template  
584 synthesized. Some problems users may encounter are: (a) weak or no amplification of the  
585 desired product, (b) primer-dimer formation, and (c) products resulting from amplification due  
586 to non-specific binding. It is helpful to check the primers, before ordering them, to ensure that  
587 they do not form primer-dimers. There are several web-based tools (ex: idtDNA) that can be  
588 accessed to analyze primer pairs for primer-dimer formation. If little or no product is produced,  
589 applying a temperature gradient at the annealing step may be useful in order to optimize this  
590 step. If the user is still unable to generate product in this way, consider redesigning the primers  
591 that hybridize with a new sequence on or near the reporter gene. Finally, the synthesis of  
592 products due to non-specific amplification can be reduced or eliminated by thermocycling  
593 methods like touchdown PCR<sup>56</sup>. Again, redesigning primers may also eliminate the problem of  
594 non-specific amplification.

595

596 Acoustic liquid handler dispensing should be optimized for each component being transferred  
597 and it is strongly recommended to run controls to verify proper distribution and reproducibility  
598 before collecting data. The ideal source plate type and liquid class setting will depend on the  
599 specific liquid to be dispensed and its components. It is not recommended to use Echo  
600 Qualified 384-Well Polypropylene 2.0 Plus Microplates to dispense DNA, as the amine coating  
601 may interact with the DNA. It should also be noted that the ability to dispense higher  
602 concentrations of certain components may depend on the acoustic liquid handler model. For  
603 example, the Echo 550 model is able to dispense liquids containing high concentrations of salts  
604 and DMSO, whereas these components must be at lower concentrations for successful transfer  
605 with the Echo 525. A test liquid transfer may be conducted by dispensing onto a foil plate seal  
606 to visualize successful droplet formation; however, this test provides limited information and  
607 droplets from different settings may appear identical. The use of a water-soluble dye, such as  
608 tartrazine, may be used to more accurately verify the correct volume is dispensed with a given  
609 setting or workflow (Fig. 4). Optimal Echo programming of liquid transfers can also influence  
610 the accuracy and consistency of data generated; for transfers > 1  $\mu$ l from one source well to  
611 one destination well, sequential transfers of  $\leq$  1  $\mu$ l should be programmed to reduce systematic  
612 well-to-well variability (Fig. 4). Lastly, theoretical and actual source well dead volumes can vary  
613 dramatically depending on source plate type, liquid class setting, and components of the  
614 specific liquid; using the Echo to survey the well volumes prior to running a program may help



615 to gauge how accurately the Echo is able to measure a particular liquid.

616

617 CFPS reaction performance can vary when comparing results between different users, plate  
618 readers, and laboratories<sup>38</sup>. For instances where such comparisons are required while  
619 prototyping genetic circuits, we recommend including internal control reactions with standard  
620 constitutive promoters (such as pT7) in each reaction plate to help normalize results across  
621 experimental set-ups. The method of DNA preparation can also contribute majorly to CFPS  
622 activity; inclusion of an ethanol precipitation step is recommended. In addition, it is useful to  
623 validate certain aspects of the reaction preparation. For instance, it has been noted that  
624 optimal magnesium and potassium glutamate concentrations can vary depending on the  
625 promoter or reporter protein being expressed<sup>29,57</sup> or per batch of cell extract prepared<sup>33</sup>.  
626 Concentrations of these components should be optimized by screening across several  
627 concentrations of each component per genetic construct and per cell extract preparation to  
628 determine the optimal conditions for protein expression. Finally, best practices for consistent  
629 CFPS reaction performance include thorough mixing, careful pipetting, and consistency in the  
630 preparation of each reagent component.

631

632 Though this section does touch on some more common issues that may arise during screening,  
633 it is by no means an exhaustive list. Once the proper controls have been run to ensure the  
634 collection of usable and reproducible data, the method developed here is an ideal way to  
635 rapidly characterize genetic parts with a high degree of resolution.

636

#### 637 **ACKNOWLEDGMENTS:**

638

639 This work was made possible by the Office of the Secretary of Defense's Applied Research for  
640 the Advancement of Science and Technology Priorities program. We thank Scott Walper (Naval  
641 Research Laboratory) for providing the stock of sfGFP used, and Zachary Sun and Abel Chiao  
642 (Tierra Biosciences) for fruitful discussions related to prototyping with cell-free systems and  
643 related troubleshooting of acoustic liquid handling.

644

#### 645 **DISCLOSURES:**

646

647 RMM has a financial stake in Tierra Biosciences, a private company that makes use of cell-free  
648 technologies such as those described in this article for protein expression and screening.  
649 The other authors have nothing to disclose.

650

#### 651 **REFERENCES:**

652

- 653 1. Purnick, P. E. M. & Weiss, R. The second wave of synthetic biology: from modules to  
654 systems. *Nat. Rev. Mol. Cell Biol.* **10**, 410–22 (2009).
- 655 2. Saltepe, B. Cellular Biosensors with Engineered Genetic Circuits. *ACS Sensors* **3**, 13–26  
656 (2018).
- 657 3. Bereza-Malcolm, L. T., Mann, G. & Franks, A. E. Environmental Sensing of Heavy Metals  
658 Through Whole Cell Microbial Biosensors: A Synthetic Biology Approach. *ACS Synth. Biol.*

- 659 4, 535–546 (2015).
- 660 4. Gautam, P., Suniti, S., Amrita, K., Madathil, D. & N, B. N. A. A Review on Recent Advances  
661 in Biosensors for Detection of Water Contamination. *Int. J. Environ. Sci.* **2**, 1565–1574  
662 (2012).
- 663 5. Mimee, M. *et al.* An Ingestible Bacterial-Electronic System to Monitor Gastrointestinal  
664 Health. *Science (80-. )*. **918**, 915–918 (2018).
- 665 6. Isabella, V. M. *et al.* Development of a Synthetic Live Bacterial Therapeutic for the  
666 Human Metabolic Disease Phenylketonuria. *Nat. Biotechnol.* **36**, 857–864 (2018).
- 667 7. Healy, C. P. & Deans, T. L. Genetic circuits to engineer tissues with alternative functions.  
668 *J. Biol. Eng.* **13**, 1–7 (2019).
- 669 8. Kaushik, A., Tiwari, S., Dev Jayant, R., Marty, A. & Nair, M. Towards Detection and  
670 Diagnosis of Ebola virus Disease at Point-of-Care. *Biosens. Bioelectron.* **75**, 254–272  
671 (2016).
- 672 9. Jagadevan, S. *et al.* Biotechnology for Biofuels Recent Developments in Dynthetic Biology  
673 and Metabolic Engineering in Microalgae Towards Biofuel Production. *Biotechnol.*  
674 *Biofuels* **11**, 1–21 (2018).
- 675 10. Keating, K. W. & Young, E. M. Synthetic Biology for Bio-Derived Structural Materials. *Curr.*  
676 *Opin. Chem. Eng.* **24**, 107–114 (2019).
- 677 11. Smanski, M. J., Zhou, H., Claesen, J., Shen, B. & Fischbach, M. A. Synthetic Biology to  
678 Access and Expand Nature’s Chemical Diversity. *Nat. Publ. Gr.* **14**, 135–149 (2016).
- 679 12. Xiang, Y., Dalchau, N. & Wang, B. Scaling Up Genetic Circuit Design for Cellular  
680 Computing: Advances and Prospects. *Nat. Comput.* **17**, 833–853 (2018).
- 681 13. Galdzicki, M., Rodriguez, C., Chandran, D., Sauro, H. M. & Gennari, J. H. Standard  
682 Biological Parts Knowledgebase. *PLoS One* **6**, 1–8 (2011).
- 683 14. Kelwick, R., Bowater, L., Yeoman, K. H. & Bowater, R. P. Promoting Microbiology  
684 Education through the iGEM Synthetic Biology Competition. *FEMS Microbiol. Lett.* **362**,  
685 1–8 (2015).
- 686 15. Torella, J. P. *et al.* Unique Nucleotide Sequence (UNS)-Guided Assembly of Repetitive  
687 DNA parts for Synthetic Biology Applications. *Nat. Protoc.* **9**, 2075–2089 (2016).
- 688 16. Halleran, A. D., Swaminathan, A. & Murray, R. M. Single Day Construction of Multigene  
689 Circuits with 3G Assembly. *ACS Synth. Biol.* **7**, 1477–1480 (2018).
- 690 17. Nielsen, A. K. *et al.* Genetic circuit design automation. *Science (80-. )*. **352**, aac7341  
691 (2016).
- 692 18. Canton, B., Labno, A. & Endy, D. Refinement and standardization of synthetic biological  
693 parts and devices. *Online* **26**, 787–793 (2008).
- 694 19. Boehm, C. R. & Bock, R. Update on DNA Technology Recent Advances and Current  
695 Challenges in Synthetic Biology of the Plastid Genetic System and Metabolism [ OPEN ].  
696 *Plant Physiol.* **179**, 794–802 (2019).
- 697 20. Takahashi, M. K. *et al.* Characterizing and prototyping genetic networks with cell-free  
698 transcription-translation reactions. *Methods* **86**, 60–72 (2015).
- 699 21. Chappell, J., Watters, K. E., Takahashi, M. K. & Lucks, J. B. A Renaissance in RNA Synthetic  
700 Biology: New Mechanisms, Applications and Tools for the Future. *Curr. Opin. Chem. Biol.*  
701 **28**, 47–56 (2015).
- 702 22. Endy, D. Foundations for engineering biology. *Nature* **438**, 449–53 (2005).

- 703 23. Shis, D. L. & Bennett, M. R. Synthetic biology: The Many Facets of T7 RNA Polymerase.  
704 *Mol. Syst. Biol.* **10**, 745 (2014).
- 705 24. Iyer, S., Karig, D. K., Norred, S. E., Simpson, M. L. & Doktycz, M. J. Multi-Input Regulation  
706 and Logic with T7 Promoters in Cells and Cell-Free Systems. **8**, 1–12 (2013).
- 707 25. Karig, D. K., Iyer, S., Simpson, M. L. & Doktycz, M. J. Expression optimization and  
708 synthetic gene networks in cell-free systems. *Nucleic Acids Res.* **40**, 3763–3774 (2012).
- 709 26. McManus, J. B., Emanuel, P. A., Murray, R. M. & Lux, M. W. A method for cost-effective  
710 and rapid characterization of engineered T7-based transcription factors by cell-free  
711 protein synthesis reveals insights into the regulation of T7 RNA polymerase-driven  
712 expression. *Arch. Biochem. Biophys.* **674**, 108045 (2019).
- 713 27. Jung, J. K. *et al.* Cell-free biosensors for rapid detection of water contaminants. *Nat.*  
714 *Biotechnol.* **38**, (2020).
- 715 28. Dopp, J. L., Rothstein, S. M., Mansell, T. J. & Reuel, N. F. Rapid prototyping of proteins:  
716 Mail order gene fragments to assayable proteins within 24 hours. *Biotechnol. Bioeng.*  
717 **116**, 667–676 (2019).
- 718 29. Garamella, J., Marshall, R., Rustad, M. & Noireaux, V. The All E. coli TX-TL Toolbox 2.0: A  
719 Platform for Cell-Free Synthetic Biology. *ACS Synth. Biol.* **5**, 344–355 (2016).
- 720 30. Kopniczky, M. B. *et al.* Cell-Free Protein Synthesis as a Prototyping Platform for  
721 Mammalian Synthetic Biology. *ACS Synth. Biol.* **9**, 144–156 (2020).
- 722 31. Kelwick, R. *et al.* Cell-free prototyping strategies for enhancing the sustainable  
723 production of polyhydroxyalkanoates bioplastics. *Synth. Biol.* **3**, 1–12 (2018).
- 724 32. Karim, A. S. *et al.* In vitro prototyping and rapid optimization of biosynthetic enzymes for  
725 cell design. *Nat. Chem. Biol.* **16**, 912–919 (2020).
- 726 33. Sun, Z. Z. *et al.* Protocols for implementing an Escherichia coli based TX-TL cell-free  
727 expression system for synthetic biology. *J. Vis. Exp.* 1–14 (2013). doi:10.3791/50762
- 728 34. Dopp, J. L., Tamiev, D. D. & Reuel, N. F. Cell-free supplement mixtures: Elucidating the  
729 history and biochemical utility of additives used to support in vitro protein synthesis in E.  
730 coli extract. *Biotechnol. Adv.* **37**, 246–258 (2019).
- 731 35. Cole, S. D., Miklos, A. E., Chiao, A. C., Sun, Z. Z. & Lux, M. W. Methodologies for  
732 preparation of prokaryotic extracts for cell-free expression systems. *Synth. Syst.*  
733 *Biotechnol.* **5**, 252–267 (2020).
- 734 36. Bailey, J., Eggenstein, E. & Lesnick, J. Miniaturization and Rapid Processing of TXTL  
735 Reactions Using Acoustic Liquid Handling Miniaturization and Rapid Processing of TXTL  
736 Reactions Using Acoustic Liquid Handling. 1–12
- 737 37. Marshall, R., Garamella, J., Noireaux, V. & Pierson, A. High-Throughput Microliter-Sized  
738 Cell-Free Transcription-Translation Reactions for Synthetic Biology Applications using the  
739 Echo 550 Liquid Handler. *Labcyte* 1–6 (2018).
- 740 38. Cole, S. D. *et al.* Quantification of Interlaboratory Cell-Free Protein Synthesis Variability.  
741 *ACS Synth. Biol.* **8**, 2080–2091 (2019).
- 742 39. Sitaraman, K. *et al.* A novel cell-free protein synthesis system. *J. Biotechnol.* **110**, 257–263  
743 (2004).
- 744 40. Sun, Z. Z., Yeung, E., Hayes, C. A., Noireaux, V. & Murray, R. M. Linear DNA for rapid  
745 prototyping of synthetic biological circuits in an escherichia coli based TX-TL cell-free  
746 system. *ACS Synth. Biol.* **3**, 387–397 (2014).

- 747 41. Marshall, R. *et al.* Short DNA Containing x Sites Enhances DNA Stability and Gene  
748 Expression in E. coli Cell-Free Transcription – Translation Systems. **9999**, (2017).
- 749 42. Yim, S. S., Johns, N. I., Noireaux, V. & Wang, H. H. Protecting linear DNA templates in cell-  
750 free expression systems from diverse bacteria. *ACS Synth. Biol.* 0–4 (2020).  
751 doi:10.1021/acssynbio.0c00277
- 752 43. Zhu, B. *et al.* Increasing cell-free gene expression yields from linear templates in  
753 Escherichia coli and Vibrio natriegens extracts by using DNA-binding proteins. *Biotechnol.*  
754 *Bioeng.* 3849–3857 (2020). doi:10.1002/bit.27538
- 755 44. Tuckey, C., Haruichi, A., Zhaou, Y. & Chong, S. *Protein Synthesis Using A Reconstituted*  
756 *Cell-Free System.* (2015). doi:10.1002/0471142727.mb1631s108.Protein
- 757 45. Hoffman, R. A., Wang, L., Bigos, M. & Nolan, J. P. NIST / ISAC Standardization Study<sup>2</sup>:  
758 Variability in Assignment of Intensity Values to Fluorescence Standard Beads and in Cross  
759 Calibration of Standard Beads to Hard Dyed Beads. doi:10.1002/cyto.a.22086
- 760 46. Rossi, N. A. & Dunlop, M. J. Making Waves with Synthetic Oscillators. *Cell Syst.* **6**, 406–  
761 407 (2018).
- 762 47. Niederholtmeyer, H. *et al.* Rapid cell-free forward engineering of novel genetic ring  
763 oscillators. *Elife* **4**, (2015).
- 764 48. Chang, H., Voyvodic, P. L. & Structurale, C. D. B. Microbially Derived Biosensors for  
765 Diagnosis, Monitoring and Epidemiology. *Microb. Biotechnol.* **10**, 1031–1035 (2017).
- 766 49. Pardee, K. *et al.* Rapid, Low-Cost Detection of Zika Virus Using Programmable  
767 Biomolecular Components. *Cell* **165**, 1255–1266 (2016).
- 768 50. Pardee, K. *et al.* Portable, On-Demand Biomolecular Manufacturing. *Cell* **167**, 248-  
769 259.e12 (2016).
- 770 51. Pardee, K. *et al.* Paper-based synthetic gene networks. *Cell* **159**, 940–954 (2014).
- 771 52. Liu, X., Germaine, K. J., Ryan, D. & Dowling, D. N. Whole-Cell Fluorescent Biosensors for  
772 Bioavailability and Biodegradation of Polychlorinated Biphenyls. 1377–1398 (2010).  
773 doi:10.3390/s100201377
- 774 53. Kelwick, R., Webb, A. J., MacDonald, J. T. & Freemont, P. S. Development of a Bacillus  
775 subtilis cell-free transcription-translation system for prototyping regulatory elements.  
776 *Metab. Eng.* **38**, 370–381 (2016).
- 777 54. Wang, H., Li, J. & Jewett, M. C. Development of a Pseudomonas putida cell-free protein  
778 synthesis platform for rapid screening of gene regulatory elements. *Synth. Biol.* **3**, 1–7  
779 (2018).
- 780 55. Failmezger, J., Scholz, S., Blombach, B. & Siemann-Herzberg, M. Cell-free protein  
781 synthesis from fast-growing Vibrio natriegens. *Front. Microbiol.* **9**, 1–10 (2018).
- 782 56. Korbie, D. J. & Mattick, J. S. Touchdown PCR for Increased Specificity and Sensitivity in  
783 PCR Amplification. *Nat. Protoc.* **3**, 13–15 (2008).
- 784 57. Silverman, A. D. *et al.* HHS Public Access. **8**, 403–414 (2019).  
785  
786
